# Supplementary material for: Ca2+ permeation and/or binding to CaV1.1 fine-tunes skeletal muscle Ca2+ signaling to sustain muscle function
Source: PubMed Central journal article supplement (PMC4340672; doi:10.1186/s13395-014-0027-1), 2015-01-29
Supplement: 13395_2014_27_MOESM1_ESM.pdf [file 13395_2014_27_MOESM1_ESM.pdf]

**Supplemental Table 1: Antibodies used**

| Antibody                | Company           | WB     | IHC   | P.L.A. | Cat. No.    |
|-------------------------|-------------------|--------|-------|--------|-------------|
| Ca <sub>v</sub> 1.1β    | Santa Cruz        |        |       | 1:30   | sc-15970    |
| Ca <sub>v</sub> 1.1α    | Thermo Scientific | 1:1000 | 1:200 |        | MA3-920     |
| CaMKII                  | Santa Cruz        |        |       | 1:50   | sc-9035     |
| CaMKII                  | Cell Signaling    | 1:1000 | 1:100 |        | #3362       |
| Phospho CaMKII (T286)   | Cell Signaling    | 1:1000 |       |        | #3361       |
| Calsequestrin           | Thermo Scientific | 1:1000 |       |        | PA1-913     |
| RyR1                    | Thermo Scientific | 1:2000 |       |        | MA3-925     |
| SERCA1                  | Thermo Scientific | 1:1000 |       |        | MA3-911     |
| SERCA2                  | Thermo Scientific | 1:1000 |       |        | MA3-919     |
| Sarcolipin              | ProteinTech Group | 1:1000 |       |        | 183951-1-AP |
| GAPDH                   | Santa Cruz        | 1:500  |       |        | sc-20357    |
| GSK3β                   | Santa Cruz        | 1:500  |       |        | sc-9166     |
| Phospho GSK3β (S9)      | Santa Cruz        | 1:500  |       |        | sc-11757    |
| Phospho Akt1 (S473)     | Cell Signaling    | 1:1000 |       |        | #9271       |
| Phospho Akt2 (S474)     | Thermo Scientific | 1:1000 |       |        | PA1-14034   |
| Phospho Akt1 (T308)     | Cell Signaling    | 1:1000 |       |        | #2965P      |
| Akt1/2                  | Santa Cruz        | 1:500  |       |        | sc-1619     |
| Neurofilament M         | Millipore         |        | 1:200 |        | AB1987      |
| Myosin Heavy Chain 1    | DSHB              |        | 1:50  |        | BA-F8       |
| Myosin Heavy Chain 2a   | DSHB              |        | 1:50  |        | SC-71       |
| Myosin Heavy Chain 2b   | DSHB              |        | 1:50  |        | BF-F3       |
| Phospho-eEF2 (T56)      | Cell Signaling    | 1:1000 |       |        | #2331       |
| eEF2                    | Cell Signaling    | 1:1000 |       |        | #2332       |
| Phospho-S6 (S235/236)   | Cell Signaling    | 1:1000 |       |        | #4858       |
| S6                      | Cell Signaling    | 1:1000 |       |        | #2317       |
| Phospho-4E-BP1 (T37/47) | Cell Signaling    | 1:1000 |       |        | #2855       |
| 4E-BP1                  | Cell Signaling    | 1:1000 |       |        | #9644       |
| Phospho ERK (T202/Y204) | Santa Cruz        | 1:500  |       |        | sc-16982-R  |
| Phospho mTOR (S2844)    | Cell Signaling    | 1:1000 |       |        | #2971S      |
| mTOR                    | Cell Signaling    | 1:1000 |       |        | #2972       |
| Puromycin               | KeraFAST          | 1:1000 |       |        | EQ-0001     |
| Phospho Raf (S338)      | Cell Signaling    | 1:1000 |       |        | #9427       |
| Raf-1                   | Santa Cruz        | 1:500  |       |        | sc-227      |
| Ras                     | abcam             | 1:1000 |       |        | ab79973     |

WB=Western blotting, IHC=Immunohistochemistry, P.L.A.=Proximity Ligation Assay

Abcam (Cambridge, MA, United States); Cell Signaling (Danvers, MA, United States); DSHB (Iowa City, United States); KeraFAST (Boston, MA, United States); Millipore (Billerica, Massachusetts, United States); ProteinTech group (Chicago, IL, United States); Santa Cruz (Santa Cruz, CA, United States); Thermo Scientific (Waltham, MA, United States)
